# Supplementary material for: Herbivory Rather than Root Competition and Environmental Factors Determines Plant Establishment in Fragmented Forests
Source: MDPI journal article supplement (doi:10.3390/f13050767), 2022-05-16
Supplement: s1 [file s1]

# Herbivory rather than root competition and environmental factors determines plant establishment in fragmented forests

Tianxiang Li, Xue Li, Chuping Wu, Yuping Zhong, Mingjian Yu, and Jinliang Liu

## Supplementary Materials

**Table S1** The number of survived seedlings in 32 plots on 11 islands.

**Table S2** The environmental variables in 32 plots on 11 islands.

**Table S1.** The number of survived seedlings in 32 plots under three experimental treatments (Control, excluding root competition, and excluding herbivory) for four species (*Cinnamomum camphora*, *Cyclobalanopsis glauca*, *Loropetalum chinense*, *Schima superba*).

|      | <i>Cinnamomum camphora</i> |                                         |                               | <i>Cyclobalanopsis glauca</i> |                                         |                               | <i>Loropetalum chinense</i> |                                         |                               | <i>pSchima superba</i> |                                         |                               |
|------|----------------------------|-----------------------------------------|-------------------------------|-------------------------------|-----------------------------------------|-------------------------------|-----------------------------|-----------------------------------------|-------------------------------|------------------------|-----------------------------------------|-------------------------------|
|      | Control                    | Exclud-<br>ing root<br>competi-<br>tion | Exclud-<br>ing her-<br>bivory | Control                       | Exclud-<br>ing root<br>competi-<br>tion | Exclud-<br>ing her-<br>bivory | Control                     | Exclud-<br>ing root<br>competi-<br>tion | Exclud-<br>ing her-<br>bivory | Control                | Exclud-<br>ing root<br>competi-<br>tion | Exclud-<br>ing her-<br>bivory |
| B1B1 | 0                          | 0                                       | 7                             | 0                             | 0                                       | 2                             | 10                          | 9                                       | 23                            | 2                      | 2                                       | 1                             |
| B1B2 | 15                         | 4                                       | 12                            | 1                             | 1                                       | 3                             | 15                          | 13                                      | 24                            | 0                      | 1                                       | 1                             |
| B1N1 | 0                          | 4                                       | 8                             | 0                             | 2                                       | 2                             | 1                           | 6                                       | 13                            | 1                      | 1                                       | 1                             |
| B1N2 | 0                          | 0                                       | 6                             | 0                             | 0                                       | 4                             | 1                           | 5                                       | 15                            | 2                      | 6                                       | 3                             |
| B2B1 | 5                          | 3                                       | 11                            | 2                             | 0                                       | 5                             | 11                          | 11                                      | 13                            | 2                      | 3                                       | 0                             |
| B2B2 | 0                          | 0                                       | 8                             | 1                             | 0                                       | 6                             | 13                          | 13                                      | 11                            | 1                      | 1                                       | 2                             |
| B2N1 | 0                          | 1                                       | 12                            | 4                             | 2                                       | 4                             | 14                          | 17                                      | 13                            | 1                      | 0                                       | 1                             |
| B2N2 | 4                          | 1                                       | 8                             | 2                             | 0                                       | 3                             | 11                          | 13                                      | 22                            | 4                      | 3                                       | 13                            |
| B5B1 | 0                          | 1                                       | 14                            | 1                             | 0                                       | 10                            | 1                           | 0                                       | 6                             | 2                      | 4                                       | 1                             |
| B5B2 | 1                          | 0                                       | 23                            | 0                             | 0                                       | 10                            | 3                           | 6                                       | 10                            | 4                      | 9                                       | 13                            |
| B5N1 | 1                          | 0                                       | 17                            | 0                             | 1                                       | 2                             | 12                          | 9                                       | 18                            | 3                      | 0                                       | 5                             |
| B5N2 | 1                          | 0                                       | 13                            | 0                             | 0                                       | 15                            | 2                           | 3                                       | 23                            | 1                      | 1                                       | 2                             |
| B7B1 | 14                         | 15                                      | 21                            | 1                             | 1                                       | 2                             | 10                          | 11                                      | 17                            | 1                      | 4                                       | 5                             |
| B7B2 | 0                          | 0                                       | 8                             | 0                             | 2                                       | 12                            | 4                           | 3                                       | 27                            | 8                      | 3                                       | 5                             |
| B7N1 | 0                          | 0                                       | 9                             | 7                             | 1                                       | 2                             | 10                          | 9                                       | 14                            | 5                      | 12                                      | 5                             |
| B7N2 | 3                          | 0                                       | 15                            | 0                             | 0                                       | 8                             | 2                           | 2                                       | 7                             | 2                      | 1                                       | 1                             |
| N3S1 | 0                          | 2                                       | 10                            | 0                             | 0                                       | 12                            | 2                           | 7                                       | 19                            | 6                      | 1                                       | 3                             |
| N3S2 | 0                          | 0                                       | 4                             | 1                             | 0                                       | 9                             | 2                           | 3                                       | 13                            | 3                      | 2                                       | 1                             |
| N4S1 | 3                          | 0                                       | 13                            | 1                             | 0                                       | 8                             | 5                           | 3                                       | 23                            | 5                      | 1                                       | 3                             |
| N4S2 | 1                          | 1                                       | 11                            | 0                             | 0                                       | 5                             | 0                           | 3                                       | 9                             | 4                      | 4                                       | 1                             |
| N5S1 | 0                          | 0                                       | 15                            | 0                             | 0                                       | 6                             | 12                          | 13                                      | 15                            | 2                      | 3                                       | 5                             |
| N5S2 | 1                          | 0                                       | 15                            | 0                             | 0                                       | 9                             | 8                           | 13                                      | 14                            | 6                      | 6                                       | 13                            |
| N6S1 | 0                          | 1                                       | 13                            | 0                             | 0                                       | 5                             | 8                           | 9                                       | 23                            | 4                      | 5                                       | 6                             |
| N6S2 | 0                          | 6                                       | 12                            | 0                             | 0                                       | 11                            | 10                          | 9                                       | 17                            | 6                      | 4                                       | 3                             |
| N7S1 | 9                          | 13                                      | 13                            | 1                             | 1                                       | 9                             | 30                          | 26                                      | 27                            | 4                      | 4                                       | 2                             |
| N7S2 | 0                          | 0                                       | 24                            | 0                             | 3                                       | 10                            | 10                          | 18                                      | 24                            | 4                      | 6                                       | 10                            |
| N8S1 | 1                          | 0                                       | 19                            | 0                             | 0                                       | 15                            | 25                          | 18                                      | 23                            | 3                      | 8                                       | 9                             |
| N8S2 | 1                          | 0                                       | 24                            | 3                             | 2                                       | 9                             | 17                          | 13                                      | 27                            | 8                      | 8                                       | 2                             |

|      |   |    |    |   |   |   |    |    |    |   |   |    |
|------|---|----|----|---|---|---|----|----|----|---|---|----|
| N9B1 | 1 | 6  | 19 | 0 | 3 | 9 | 7  | 14 | 21 | 0 | 2 | 6  |
| N9B2 | 7 | 21 | 17 | 0 | 0 | 2 | 21 | 24 | 24 | 5 | 7 | 4  |
| N9N1 | 2 | 7  | 16 | 0 | 0 | 5 | 13 | 10 | 21 | 5 | 8 | 5  |
| N9N2 | 7 | 3  | 6  | 2 | 0 | 9 | 28 | 25 | 26 | 6 | 6 | 12 |

Table S2. The environmental variables in 32 plots on 11 islands.

| Plots | Soil depth(cm) | Litter depth(cm) | Slope(°)      | Altitude(m)   | Irradiance  | Edge distance(m) | Area(ha) |
|-------|----------------|------------------|---------------|---------------|-------------|------------------|----------|
| B1B1  | 13.68 ± 2.40   | 2.69 ± 0.05      | 21.67 ± 7.51  | 112.00 ± 2.65 | 0.93 ± 0.02 | 19.17 ± 2.56     | 1153.88  |
| B1B2  | 9.34 ± 1.63    | 2.33 ± 0.52      | 34.67 ± 3.51  | 112.00 ± 4.36 | 0.80 ± 0.24 | 24.57 ± 2.78     | 1153.88  |
| B1N1  | 13.50 ± 2.29   | 2.50 ± 0.12      | 13.00 ± 2.65  | 142.00 ± 2.00 | 0.61 ± 0.52 | 74.49 ± 7.27     | 1153.88  |
| B1N2  | 13.53 ± 0.53   | 2.60 ± 0.18      | 36.00 ± 4.36  | 144.33 ± 8.14 | 0.91 ± 0.02 | 68.78 ± 5.45     | 1153.88  |
| B2B1  | 18.49 ± 1.02   | 2.93 ± 0.21      | 41.00 ± 3.00  | 134.00 ± 1.00 | 0.75 ± 0.02 | 15.81 ± 3.19     | 154.55   |
| B2B2  | 19.26 ± 2.78   | 2.70 ± 0.26      | 12.67 ± 7.23  | 123.00 ± 5.29 | 0.75 ± 0.10 | 34.83 ± 5.99     | 154.55   |
| B2N1  | 17.97 ± 3.82   | 2.77 ± 0.18      | 32.33 ± 9.87  | 153.00 ± 1.00 | 0.54 ± 0.47 | 63.67 ± 2.88     | 154.55   |
| B2N2  | 11.18 ± 2.44   | 1.83 ± 0.33      | 36.00 ± 12.17 | 163.33 ± 4.04 | 0.83 ± 0.01 | 117.50 ± 15.72   | 154.55   |
| B5B1  | 9.05 ± 0.61    | 2.13 ± 0.12      | 31.00 ± 6.24  | 127.67 ± 2.89 | 0.87 ± 0.02 | 33.57 ± 4.31     | 106.67   |
| B5B2  | 8.02 ± 1.62    | 1.72 ± 0.33      | 26.33 ± 3.79  | 116.00 ± 3.61 | 0.81 ± 0.08 | 29.25 ± 4.85     | 106.67   |
| B5N1  | 14.59 ± 0.75   | 2.71 ± 0.05      | 45.33 ± 5.51  | 158.67 ± 4.73 | 0.67 ± 0.04 | 49.28 ± 2.71     | 106.67   |
| B5N2  | 10.47 ± 1.17   | 1.26 ± 0.19      | 30.33 ± 5.86  | 141.67 ± 0.58 | 0.88 ± 0.02 | 68.41 ± 6.20     | 106.67   |
| B7B1  | 9.05 ± 0.61    | 2.13 ± 0.12      | 34.00 ± 6.00  | 125.67 ± 2.52 | 0.81 ± 0.04 | 21.59 ± 2.72     | 23.88    |
| B7B2  | 8.02 ± 1.62    | 1.72 ± 0.33      | 38.00 ± 3.61  | 108.67 ± 1.53 | 0.79 ± 0.03 | 8.37 ± 0.68      | 23.88    |
| B7N1  | 14.59 ± 0.75   | 2.71 ± 0.05      | 37.33 ± 2.08  | 144.00 ± 2.65 | 0.86 ± 0.01 | 61.3 ± 6.06      | 23.88    |
| B7N2  | 10.47 ± 1.17   | 1.26 ± 0.19      | 29.33 ± 8.96  | 127.00 ± 2.00 | 0.86 ± 0.02 | 40.52 ± 4.35     | 23.88    |
| N3S1  | 12.64 ± 1.30   | 2.65 ± 0.04      | 24.67 ± 8.62  | 119.00 ± 2.65 | 0.90 ± 0.02 | 16.92 ± 4.20     | 1.06     |
| N3S2  | 12.86 ± 0.84   | 2.58 ± 0.56      | 33.67 ± 2.52  | 115.00 ± 3.00 | 0.91 ± 0.02 | 25.09 ± 0.98     | 1.06     |
| N4S1  | 11.87 ± 0.89   | 2.50 ± 0.27      | 17.33 ± 6.11  | 109.00 ± 1.73 | 0.86 ± 0.10 | 15.45 ± 3.69     | 1.42     |
| N4S2  | 12.62 ± 0.27   | 2.58 ± 0.30      | 20.67 ± 9.29  | 115.00 ± 1.73 | 0.85 ± 0.03 | 18.63 ± 5.00     | 1.42     |
| N5S1  | 19.26 ± 0.27   | 2.61 ± 0.04      | 23.67 ± 3.79  | 125.00 ± 1.00 | 0.90 ± 0.03 | 29.44 ± 1.33     | 1.62     |
| N5S2  | 12.34 ± 1.80   | 2.26 ± 0.20      | 21.00 ± 7.00  | 109.67 ± 2.52 | 0.88 ± 0.07 | 14.60 ± 4.01     | 1.62     |
| N6S1  | 15.37 ± 1.73   | 2.92 ± 0.18      | 26.67 ± 9.29  | 112.33 ± 2.52 | 0.90 ± 0.05 | 20.68 ± 1.29     | 2.26     |
| N6S2  | 11.19 ± 1.87   | 2.38 ± 0.44      | 31.00 ± 13.00 | 123.00 ± 6.56 | 0.65 ± 0.50 | 32.25 ± 0.48     | 2.26     |
| N7S1  | 15.14 ± 1.42   | 2.43 ± 0.09      | 37.33 ± 4.51  | 119.67 ± 4.16 | 0.89 ± 0.02 | 14.98 ± 2.68     | 4.19     |
| N7S2  | 14.05 ± 2.08   | 2.26 ± 0.32      | 22.33 ± 4.16  | 117.00 ± 1.73 | 0.84 ± 0.03 | 15.49 ± 1.18     | 4.19     |
| N8S1  | 14.11 ± 3.60   | 2.55 ± 0.37      | 40.67 ± 4.62  | 119.33 ± 10.5 | 0.87 ± 0.06 | 15.94 ± 4.74     | 3.05     |
| N8S2  | 8.63 ± 0.41    | 2.09 ± 0.33      | 39.67 ± 3.79  | 113.67 ± 3.21 | 0.67 ± 0.27 | 16.95 ± 0.77     | 3.05     |
| N9B1  | 8.56 ± 1.09    | 1.76 ± 0.44      | 28.33 ± 9.29  | 125.33 ± 7.02 | 0.73 ± 0.15 | 22.18 ± 5.03     | 74       |
| N9B2  | 12.53 ± 2.11   | 2.29 ± 0.25      | 31.00 ± 3.46  | 112.33 ± 3.21 | 0.66 ± 0.08 | 17.40 ± 3.80     | 74       |
| N9N1  | 13.71 ± 4.76   | 2.20 ± 0.38      | 45.00 ± 2.65  | 185.33 ± 4.73 | 0.87 ± 0.08 | 70.07 ± 7.02     | 74       |
| N9N2  | 10.88 ± 1.35   | 2.12 ± 0.25      | 10.00 ± 6.08  | 125.67 ± 4.04 | 0.58 ± 0.50 | 42.51 ± 1.29     | 74       |
